# Supplementary material for: H5N1 infection impairs the alveolar epithelial barrier through intercellular junction proteins via Itch-mediated proteasomal degradation
Source: PubMed Central journal article supplement (PMC8888635; doi:10.1038/s42003-022-03131-3), 2022-03-01
Supplement: 42003_2022_3131_MOESM2_ESM.pdf [file 42003_2022_3131_MOESM2_ESM.pdf]

## Description of Additional Supplementary Files

**File name:** Supplementary Data 1

**Description:** Source data that underline the graphs in figures.
